# Supplementary material for: Comment on “Mixed azido/phenoxido bridged trinuclear Cu(ii) complexes of Mannich bases: synthesis, structures, magnetic properties and catalytic oxidase activities”, Dalton Trans., 2018, 47, 9385–9399 and “Tri- and hexa-nuclear NiII–MnII complexes of a N2O2 donor unsymmetrical ligand: synthesis, structures, magnetic properties and catalytic oxidase activities”, Dalton Trans., 2018, 47, 13957–13971
Source: Royal Society of Chemistry journal article supplement (doi:10.1039/c9dt01498e), 2020-01-01
Supplement: c9dt01498e1.pdf [file c9dt01498e1.pdf]

Supporting information for

## Growing trend in the gross overestimation of catalytic parameters published in Inorganic Chemistry Journals

Laura Gasque<sup>a</sup>, Alan Mendieta<sup>a</sup> and Gerardo Ferrer-Sueta<sup>b,c</sup>.

<sup>a</sup>Facultad de Química, Universidad Nacional Autónoma de México.

<sup>b</sup>Laboratorio de Físicoquímica Biológica, Facultad de Ciencias, and <sup>c</sup>Centro de Investigaciones Biomédicas (CEINBIO), Universidad de la República, Montevideo, Uruguay.

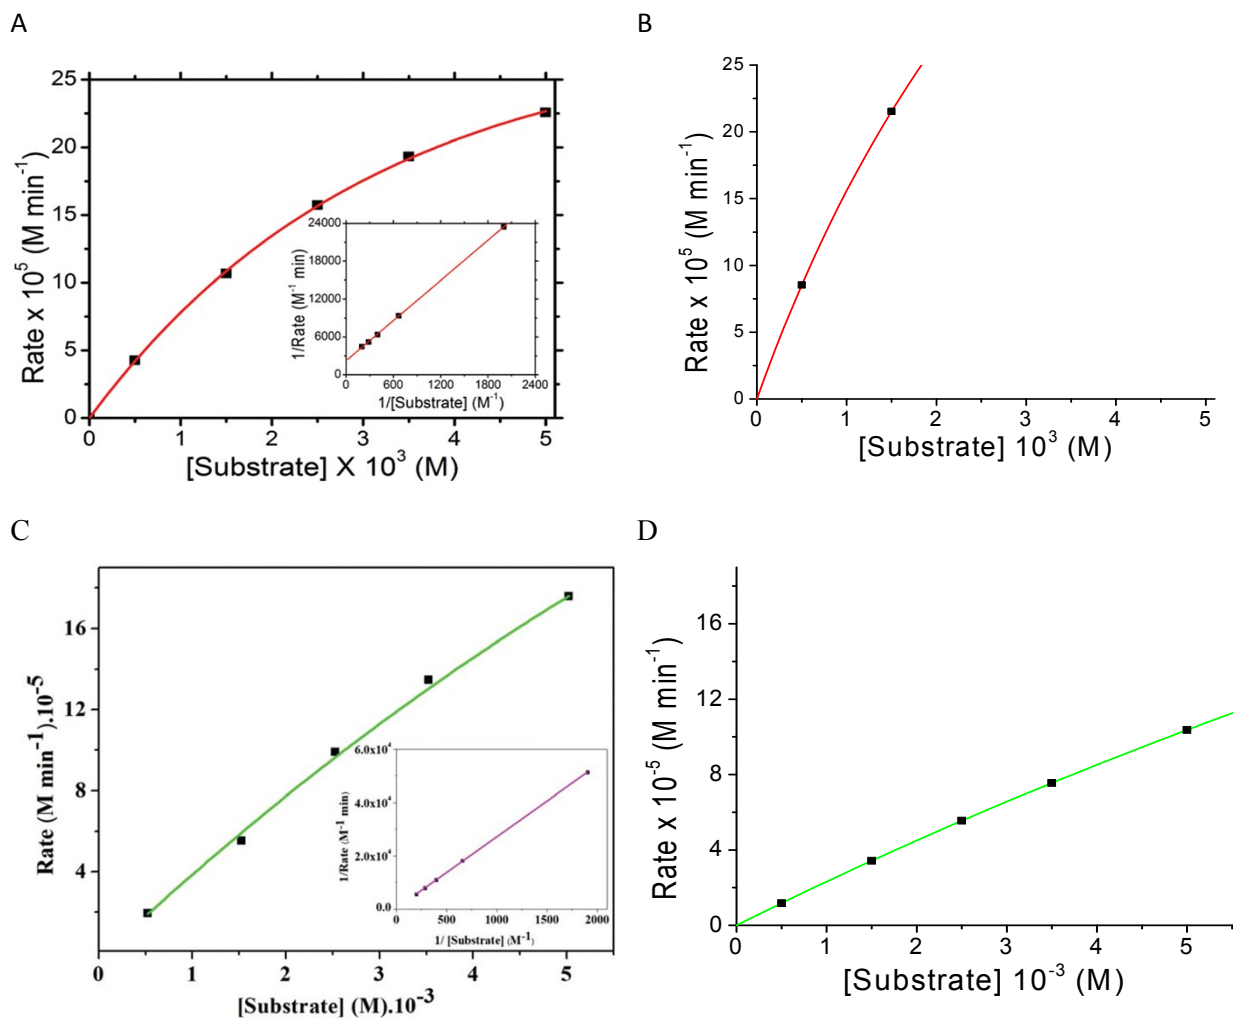

**Figure S1.** Reported and simulated plots of Rate vs [Substrate]. A and C are plots reported in <sup>1</sup> and <sup>2</sup>, respectively. B and D were generated from the kinetic parameters reported in the same articles, we kept the same scale in y to facilitate the comparison.

### References

1. A. Das, K. Bhattacharya, L. K. Das, S. Giri and A. Ghosh, *Dalton Trans*, 2018, **47**, 9385-9399.
2. P. Mahapatra, M. G. B. Drew and A. Ghosh, *Dalton Trans*, 2018, **47**, 13957-13971.
